# Supplementary material
Source: PubMed Central journal article supplement (PMC6013051)
Supplement: NIHMS969556-supplement-S1_table.pdf [file NIHMS969556-supplement-S1_table.pdf]

| Supplementary information S1 (table)                             |                      |                                               |                                                                   |                                                                                   |                      |                                                                                                                                                                       |
|------------------------------------------------------------------|----------------------|-----------------------------------------------|-------------------------------------------------------------------|-----------------------------------------------------------------------------------|----------------------|-----------------------------------------------------------------------------------------------------------------------------------------------------------------------|
| Modality                                                         | Suggestions about... | Subjective experience                         | Autonomic                                                         | Endocrine                                                                         | Immune               | Explanation of effects                                                                                                                                                |
| <i>Verbal suggestions alone</i>                                  |                      |                                               |                                                                   |                                                                                   |                      |                                                                                                                                                                       |
| Inflammatory skin reactions <sup>1</sup>                         | skin reactions       |                                               | Yes (HR)                                                          |                                                                                   | No (skin wheal size) | Reduced HR with placebo                                                                                                                                               |
| Gastric motility <sup>2</sup>                                    | gastric activity     |                                               | Mixed( effects on EGG; No effect on HRV, SCR)                     |                                                                                   |                      | Placebo effects on gastric slow-wave activity in direction of suggestions                                                                                             |
| Blood pressure (BP) <sup>3</sup>                                 | blood pressure       | Yes                                           | Mixed (effects on SCR; no effect on BP or HRV)                    |                                                                                   |                      | SCR increase and subjective drug effect with suggested effective drug                                                                                                 |
| Buprenorphine analgesia <sup>4</sup>                             | pain                 |                                               | Yes (Resp)                                                        |                                                                                   |                      | Reduced respiration with suggested effective drug                                                                                                                     |
| Electrical pain in clinic; Ischemic arm pain in lab <sup>5</sup> | pain                 | Yes                                           | Yes (HR)                                                          |                                                                                   |                      | Reduced pain and reduced HR with placebo                                                                                                                              |
| Airway resistance <sup>6</sup>                                   | airway constriction  | No                                            | Yes (Resp)                                                        |                                                                                   |                      | Increased airway resistance with suggested bronchoconstrictor                                                                                                         |
| Tourniquet pain <sup>7</sup>                                     | pain                 | Yes                                           |                                                                   | Cortisol, ACTH                                                                    |                      | Nocebo increases endocrine responses                                                                                                                                  |
| Ischemic pain <sup>8</sup>                                       | pain                 | Mixed (placebo effect only; no nocebo effect) |                                                                   | Mixed (Cortisol: Nocebo effect, no placebo effect; No effects on beta-endorphins) |                      | Nocebo increases endocrine responses; Placebo reduces pain reports                                                                                                    |
| Thermal pain <sup>9</sup>                                        | pain                 | Mixed                                         | Mixed (effects on LF/HF HRV ratio; no effects on HR or total HRV) |                                                                                   |                      | Placebo reduces low/high frequency HRV ratio, not total HRV; Placebo effects on pain intensity and stress; No placebo effect on pain unpleasantness, mood, or arousal |
| Conditioned pain modulation <sup>10</sup>                        | pain                 | Yes (females only)                            | No (HR)                                                           |                                                                                   |                      | Gender-specific effects on pain, no physio effects                                                                                                                    |

## SUPPLEMENTARY INFORMATION

| Modality                                                                               | Suggestions about...                    | Subjective experience | Autonomic                                                       | Endocrine                     | Immune                | Explanation of effects                                                                          |
|----------------------------------------------------------------------------------------|-----------------------------------------|-----------------------|-----------------------------------------------------------------|-------------------------------|-----------------------|-------------------------------------------------------------------------------------------------|
| <i>Suggestion including possible effects of learned associations</i>                   |                                         |                       |                                                                 |                               |                       |                                                                                                 |
| Caffeine <sup>11</sup>                                                                 | arousal                                 | No                    | Mixed (effects on SCR, startle eye blink; no effects on BP, HR) |                               |                       | Decaf coffee increases SCR and startle eye blink                                                |
| Hormone responses to milkshakes <sup>12</sup>                                          | calorie content                         | No                    |                                                                 | Ghrelin                       |                       | Ghrelin increases with "sensible" vs. "indulgent" milkshake                                     |
| Caffeine <sup>13</sup>                                                                 | arousal                                 | Mixed                 |                                                                 |                               |                       | Decaf coffee increases HR, subjective arousal; no effect on stress, calmness, SCL, systolic BP  |
| Muscle relaxant <sup>14</sup>                                                          | arousal                                 | Yes                   | Yes (blink)                                                     |                               |                       | Low-arousal suggestions reduce blink reflexes                                                   |
| Responses to propranolol ( $\beta$ -blocker) and atropine (Ach-m agonist) <sup>5</sup> | drug effects (Open vs hidden drug)      |                       | Yes (HR)                                                        |                               |                       | Open admin of propranolol reduces HR, open atropine increases HR                                |
| Advertising effects on allergen challenge <sup>15</sup>                                | allergic responses (via advertisements) | Yes                   |                                                                 |                               | Yes (skin wheal size) | Advertisement effects on skin wheals and beliefs in non-allergic subjects only                  |
| Hormonal responses <sup>16</sup>                                                       | hormone changes                         |                       |                                                                 | No (Growth hormone, cortisol) |                       | Growth hormone, cortisol changes with pharmacological conditioning but no effects of suggestion |
| Electrical pain <sup>17</sup>                                                          | pain*                                   | Yes                   | No (SCR)                                                        |                               |                       | Effects on pain only when suggestion is combined with response conditioning; no effects on SCR  |

## SUPPLEMENTARY INFORMATION

|                                      |       |     |                  |                                                            |
|--------------------------------------|-------|-----|------------------|------------------------------------------------------------|
| Electrical pain <sup>18</sup>        | pain* | Yes | Yes (pupil, SCR) | Dose-dependent placebo effects on pain, SCR and pupil size |
| Thermal pain <sup>19</sup>           | pain* | Yes | Yes (SCR)        | "Strong" placebo reduces pain and SCR                      |
| Thermal pain <sup>20</sup>           | pain* | Yes | Yes (SCR)        | Placebo reductions in pain and SCR, blocked by naloxone    |
| Secondary hyperalgesia <sup>21</sup> | pain* | Yes | No (HR, BP)      | Effects on pain and secondary hyperalgesia but not physio  |

Note. Autonomic and neuroendocrine effects of verbal suggestions about treatment effects. "Yes" indicates significant effects, "No" indicates null findings. Empty cells indicate a lack of available information. Studies manipulating verbal suggestions about pain or other stimulus/response features have shown effects on autonomic responses and hormone levels, though they do not always mirror the suggestions themselves. Other studies have combined suggestions with previously learned cues, or independently manipulated (crossed) learned cues with suggestion. Combined suggestion and learning has produced strong autonomic effects in some, but not all, studies. In some cases, effects were driven by learning. The effects of suggestion on autonomic and endocrine responses may depend on interactions with learning processes or their ability to engage strong affective responses. Abbreviations: ACTH: adrenocorticotrophic hormone; Blink: Startle blink reflex magnitude; BP, blood pressure; EGG: electrogastrogram; HR, heart rate; HRV, heart-rate variability; SCL, skin conductance level; SCR, skin conductance response. \*: includes response conditioning.

- Darragh, M., Booth, R.J., Koschwanez, H.E., Sollers III, J., Broadbent, E. Expectation and the placebo effect in inflammatory skin reactions A randomised-controlled trial. *Journal of psychosomatic research* 74, 439-43 (2013).
- Meissner, K. Effects of placebo interventions on gastric motility and general autonomic activity. *Journal of psychosomatic research* 66, 391-98 (2009).
- Zimmermann-Viehoff, F., Meissner, K., Koch, J., Weber, C.S., Richter, S., Deter, H-C. Autonomic effects of suggestive placebo interventions to increase or decrease blood pressure: A randomized controlled trial in healthy subjects. *Journal of psychosomatic research* 75, 32-5 (2013).
- Benedetti, F., Amanzio, M., Baldi, S., Casadio, C. & Maggi, G. Inducing placebo respiratory depressant responses in humans via opioid receptors. *The European journal of neuroscience* 11, 625-31 (1999).
- Pollo, A., Vighetti, S., Rainero, I. & Benedetti, F. Placebo analgesia and the heart. *Pain* 102, 125-33 (2003).
- Wigal, J.K., Kotses, H., Rawson, J.C., Creer, T.L. The Effects of Suggestion on the Total Respiratory Resistance of Nonasthmatic Female Subjects. *Journal of psychosomatic research* 32, 409-416 (1988).
- Benedetti, F., Amanzio, M., Vighetti, S. & Asteggiano, G. The biochemical and neuroendocrine bases of the hyperalgesic nocebo effect. *The Journal of neuroscience : the official journal of the Society for Neuroscience* 26, 12014-22 (2006).
- Johansen, O., Brox, J. & Flaten, M.A. Placebo and Nocebo Responses, Cortisol, and Circulating Beta-Endorphin. *Psychosomatic Medicine* 65, 786-790 (2003).
- Aslaksen, P.M. & Flaten, M.A. The Roles of Physiological and Subjective Stress in the Effectiveness of a Placebo on Experimentally Induced Pain. *Psychosomatic Medicine* 70, 811-818 (2008).
- Aslaksen, P.M., Bystad, M., Vambheim, S.M. & Flaten, M.A. Gender differences in placebo analgesia: event-related potentials and emotional modulation. *Psychosomatic Medicine* 73, 193-9 (2011).
- Flaten, M., Aasli, O. & Blumenthal, T. Expectations and placebo responses to caffeine-associated stimuli. *Psychopharmacology* 169, 198-204 (2003).
- Crum, A.J., Corbin, W.R., Brownell, K.D. & Salovey, P. Mind over milkshakes: mindsets, not just nutrients, determine ghrelin response. *Health psychology : official journal of the Division of Health Psychology, American Psychological Association* 30, 424-9; discussion 430-1 (2011).
- Flaten, M.A. & Blumenthal, T.D. Caffeine-associated stimuli elicit conditioned responses: an experimental model of the placebo effect. *Psychopharmacology (Berl)* 145, 105-12 (1999).
- Flaten, M.A., Simonsen, T. & Olsen, H. Drug-related information generates placebo and nocebo responses that modify the drug response. *Psychosomatic Medicine* 61, 250-5 (1999).
- Kamenica, E., Naclerio, R. & Malani, A. Advertisements impact the physiological efficacy of a branded drug. *Proceedings of the National Academy of Sciences of the United States of America* 110, 12931-5 (2013).

## SUPPLEMENTARY INFORMATION

16. Benedetti, F. et al. Conscious expectation and unconscious conditioning in analgesic, motor, and hormonal placebo/nocebo responses. *The Journal of neuroscience : the official journal of the Society for Neuroscience* 23, 4315-23 (2003).
17. De Jong, P.J., van Baast, R., Arntz, A. & Merckelbach, H. The placebo effect in pain reduction: the influence of conditioning experiences and response expectancies. *International Journal of Behavioral Medicine* 3, 14-29 (1996).
18. Nakamura, Y. et al. Investigating dose-dependent effects of placebo analgesia: a psychophysiological approach. *Pain* 153, 227-37 (2012).
19. Geuter, S., Eippert, F., Attar, C.H. & Büchel, C. Cortical and subcortical responses to high and low effective placebo treatments. *Neuroimage* 67, 227-236 (2013).
20. Eippert, F. et al. Activation of the opioidergic descending pain control system underlies placebo analgesia. *Neuron* 63, 533-43 (2009).
21. Matre, D., Casey, K.L. & Knardahl, S. Placebo-induced changes in spinal cord pain processing. *The Journal of neuroscience : the official journal of the Society for Neuroscience* 26, 559-63 (2006).
