# Supplementary material
Source: PubMed Central journal article supplement (PMC6013051)
Supplement: NIHMS969556-supplement-S2_box.pdf [file NIHMS969556-supplement-S2_box.pdf]

**Supplementary information S2 (box) | Neuroimaging studies included in Figure 3**

- 1 Atlas, L. Y., Bolger, N., Lindquist, M. A. & Wager, T. D. Brain mediators of predictive cue effects on perceived pain. *J Neurosci* 30, 12964-12977 (2010).
- 2 Atlas, L. Y. et al. Dissociable influences of opiates and expectations on pain. *The Journal of neuroscience : the official journal of the Society for Neuroscience* 32, 8053-8064 (2012).
- 3 Bingel, U., Lorenz, J., Schoell, E., Weiller, C. & Buchel, C. Mechanisms of placebo analgesia: rACC recruitment of a subcortical antinociceptive network. *Pain* (2006).
- 4 Bingel, U. et al. The effect of treatment expectation on drug efficacy: imaging the analgesic benefit of the opioid remifentanyl. *Sci Transl Med* 3, 70ra14 (2011).
- 5 Craggs, J. G., Price, D. D., Perlstein, W. M., Verne, G. N. & Robinson, M. E. The dynamic mechanisms of placebo induced analgesia: Evidence of sustained and transient regional involvement. *Pain* 139, 660-669 (2008).
- 6 Eippert, F. et al. Activation of the opioidergic descending pain control system underlies placebo analgesia. *Neuron* 63, 533-543 (2009).
- 7 Elsenbruch, S. et al. Neural mechanisms mediating the effects of expectation in visceral placebo analgesia: an fMRI study in healthy placebo responders and nonresponders. *Pain* 153, 382-390, doi:10.1016/j.pain.2011.10.036 (2012).
- 8 Geuter, S., Eippert, F., Attar, C. H. & Büchel, C. Cortical and subcortical responses to high and low effective placebo treatments. *NeuroImage* 67, 227-236, doi:doi:10.1016/j.neuroimage.2012.11.029 (2013).
- 9 Harris, R. E. et al. Traditional Chinese acupuncture and placebo (sham) acupuncture are differentiated by their effects on mu-opioid receptors (MORs). *NeuroImage* 47, 1077-1085, doi:10.1016/j.neuroimage.2009.05.083 (2009).
- 10 Hashmi, J. A. et al. Lidocaine patch (5%) is no more potent than placebo in treating chronic back pain when tested in a randomised double blind placebo controlled brain imaging study. *Mol Pain* 8, 29, doi:10.1186/1744-8069-8-29 (2012).
- 11 Keltner, J. et al. Isolating the Modulatory Effect of Expectation on Pain Transmission: A Functional Magnetic Resonance Imaging Study. *J Neurosci* 26, 4437– 4443 (2006).
- 12 Kong, J., Spaeth, R., Cook, A., Kirsch, I., Claggett, B., Vangel, M., Gollub, R.L., Smoller, J.W., & Kaptchuk, T. J. Are All Placebo Effects Equal? Placebo Pills, Sham Acupuncture, Cue Conditioning and Their Association. *PLOS ONE* 8, e67485 (2013).
- 13 Kong, J. et al. Brain activity associated with expectancy-enhanced placebo analgesia as measured by functional magnetic resonance imaging. *J Neurosci* 26, 381-388, doi:10.1523/JNEUROSCI.3556-05.2006 (2006).
- 14 Kong, J. et al. Expectancy and treatment interactions: a dissociation between acupuncture analgesia and expectancy evoked placebo analgesia. *NeuroImage* 45, 940-949, doi:10.1016/j.neuroimage.2008.12.025 (2009).
- 15 Kong, J. et al. Functional neuroanatomical investigation of vision-related acupuncture point specificity--a multisession fMRI study. *Hum Brain Mapp* 30, 38-46, doi:10.1002/hbm.20481 (2009).
- 16 Kotsis, V. et al. Perceived treatment group affects behavioral and neural responses to visceral pain in a deceptive placebo study. *Neurogastroenterol Motil*, doi:10.1111/j.1365-2982.2012.01968.x (2012).
- 17 Koyama, T., McHaffie, J. G., Laurienti, P. & Coghill, R. C. The subjective experience of pain: Where expectations become reality. *Proc Natl Acad Sci USA* (2005).
- 18 Lee, H. F., Hsieh, J. C., Lu, C. L., Yeh, T. C., Tu, C. H., Cheng, C. M., Niddam, D.M., Lin, H.C., Lee, F.Y., Chang, F. Y. . Enhanced affect/cognition-related brain responses during visceral placebo analgesia in irritable bowel syndrome patients. *Pain* 153, 1301-1310 (2012).
- 19 Lieberman, M. D. et al. The neural correlates of placebo effects: a disruption account. *NeuroImage* 22, 447-455 (2004).
- 20 Lu, H.-C. et al. Neuronal correlates in the modulation of placebo analgesia in experimentally-induced esophageal pain: A 3T-fMRI study. *Pain*, doi:10.1016/j.pain.2009.10.012 (2009).
- 21 Lui, F. et al. Neural bases of conditioned placebo analgesia. *Pain* 151, 816-824 (2010).
- 22 Nemoto, H., Nemoto, Y., Toda, H., Mikuni, M., & Fukuyama, H. . Placebo analgesia: a PET study. *Experimental brain research*, 179, 655-664 (2007).
- 23 Peciña, M., Azhar, H., Love, T. M., Lu, T., Fredrickson, B. L., Stohler, C. S., & Zubieta, J. K. . Personality Trait Predictors of Placebo Analgesia and Neurobiological Correlates. *Neuropsychopharmacology* 38, 639–646 (2012).

- 24 Petrovic, P., Kalso, E., Petersson, K. M. & Ingvar, M. Placebo and opioid analgesia-- imaging a  
shared neuronal network. *Science* 295, 1737-1740, doi:10.1126/science.1067176 (2002).
- 25 Price, D. D., Craggs, J., Verne, G., Perlstein, W. & al., e. Placebo analgesia is accompanied by  
large reductions in pain-related brain activity in irritable bowel syndrome patients. *Pain* (2007).
- 26 Schweinhardt, P., Kuchinad, A., Pukall, C. F. & Bushnell, M. C. Increased gray matter density in  
young women with chronic vulvar pain. *Pain* 140, 411-419, doi:10.1016/j.pain.2008.09.014  
(2008).
- 27 Scott, D. et al. Individual differences in reward responding explain placebo-induced expectations  
and effects. *Neuron* 55, 325-336 (2007).
- 28 Scott, D. J. et al. Placebo and Nocebo Effects Are Defined by Opposite Opioid and Dopaminergic  
Responses. *Arch Gen Psychiatry*, 12 (2008).
- 29 Stein, N., Sprenger, Christian, Scholz, Jan, Wiech, Katja, & Bingel, Ulrike. White matter integrity  
of the descending pain modulatory system is associated with interindividual differences in placebo  
analgesia. *Pain* 153, 2210-2217 (2012).
- 30 Wager, T. D., Atlas, L. Y., Leotti, L. A. & Rilling, J. K. Predicting Individual Differences in  
Placebo Analgesia: Contributions of Brain Activity during Anticipation and Pain Experience. *J*  
*Neurosci* 31, 439-452 (2011).
- 31 Wager, T. D. et al. Placebo-induced changes in fMRI in the anticipation and experience of pain.  
*Science* 303, 1162-1167 (2004).
- 32 Wager, T. D., Scott, D. J. & Zubieta, J. K. Placebo effects on human  $\mu$ -opioid activity during pain.  
*Proc Natl Acad Sci USA* 104, 11056-11061, doi:10.1073/pnas.0702413104 (2007).
- 33 Watson, A. et al. Placebo conditioning and placebo analgesia modulate a common brain network  
during pain anticipation and perception. *Pain* 145, 24-30, doi:10.1016/j.pain.2009.04.003 (2009).
- 34 Wiech, K., Lin, C. S., Brodersen, K. H., Bingel, U., Ploner, M., & Tracey, I. . Anterior insula  
integrates information about salience into perceptual decisions about pain. *The Journal of*  
*Neuroscience* 30, 16324-16331 (2010).
- 35 Wiech, K., & Tracey, I. . Pain, decisions, and actions: a motivational perspective. *Frontiers in*  
*neuroscience* 7 (2013).
- 36 Zubieta, J. et al. Placebo effects mediated by endogenous opioid activity on mu-opioid receptors.  
*Journal of Neuroscience* 25, 7754-7762 (2005).
- 37 Zubieta, J., Yau, W. & Scott, D. Belief or need? Accounting for individual variations in the  
neurochemistry of the placebo effect. *Brain* (2006).
